# Supplementary material
Source: PubMed Central journal article supplement (PMC6133720)

## **Analytical and Bioanalytical Chemistry**

### **Electronic Supplementary Material**

#### **Quantification of desmosine and isodesmosine using MALDI-ion trap tandem mass spectrometry**

Pratikkumar Rathod, Manjeet Kaur, Hsin-Pin Ho, Marissa E. Louis, Basant Dhital, Philip Durlik, Gregory Boutis, Kevin J. Mark, Jong I. Lee, Emmanuel J. Chang

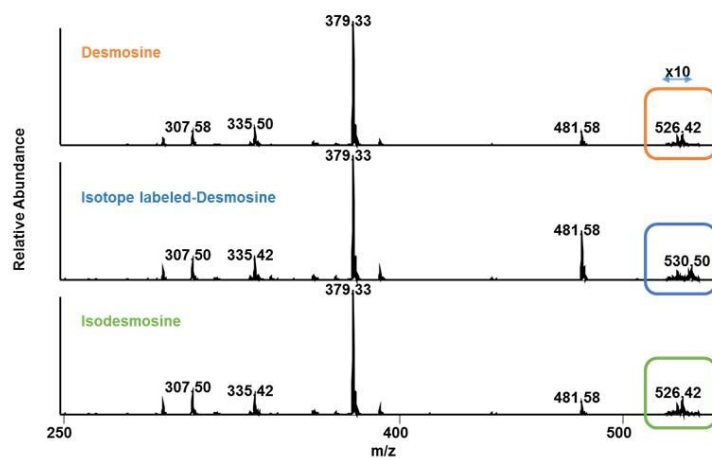

**Fig. S1** Full MS spectra of Des, Labeled-Des, and Isodes are shown as top, middle, and bottom panel. 10X magnification was applied to detect the molecular ion of each of these molecules

**Table S1** Average peak area obtained from the two sets of linearity study using MALDI-MS<sup>2</sup> quantification method is listed below. Various concentrations of Des were mixed with 25 ng/ $\mu$ L of Labeled-Des. RSD from 0.17% to 4.7% was obtained for the entire concentration range

| Des Conc<br>(ng/ $\mu$ L) | Average<br>Peak Area | SD    | %RSD  |
|---------------------------|----------------------|-------|-------|
| 3.125                     | 0.07                 | 0.000 | 0.382 |
| 6.250                     | 0.14                 | 0.004 | 3.076 |
| 12.50                     | 0.50                 | 0.001 | 0.251 |
| 25.00                     | 1.00                 | 0.007 | 0.695 |
| 31.25                     | 1.23                 | 0.058 | 4.673 |
| 43.75                     | 1.74                 | 0.068 | 3.920 |
| 50.00                     | 2.03                 | 0.058 | 2.851 |
| 62.50                     | 2.42                 | 0.068 | 2.797 |
| 80.00                     | 3.23                 | 0.014 | 0.422 |
| 105.0                     | 4.16                 | 0.053 | 1.269 |
| 125.0                     | 4.78                 | 0.008 | 0.166 |

**Table S2** Normalized peak area ratios (Des:Labeled-Des) for serial dilutions of desmosine were used to calculate LOQ using standard  $10\sigma/s$  method. These are the same samples used for the lower four concentrations in Table 1. For each series, the Des:Labeled-Des signal intensity was normalized to the amount of Labeled-Des present

| <u>Desmosine</u><br>(ng/ $\mu$ L) | <u>Relative Signal Intensity</u> |                  |
|-----------------------------------|----------------------------------|------------------|
|                                   | <u>Urine</u>                     | <u>Serum</u>     |
| 0.50                              | 111                              | 99.4             |
| 0.10                              | 23.3                             | 19.6             |
| 0.020                             | 4.59                             | 3.86             |
| 0.0040                            | 1                                | 1                |
|                                   | $\sigma = 0.490$                 | $\sigma = 0.204$ |
|                                   | s = 221.4                        | s = 198.8        |

**Table S3** Average peak area obtained from the three sets of linearity study using MALDI-MS<sup>2</sup> quantification method is listed below. Various concentrations of Des were mixed with 25 ng/ $\mu$ L of Labeled-Des. RSD from 0.46% to 4.3% was obtained for the entire concentration range

| <b>Desmosine</b><br>(ng/ $\mu$ L) | <b>Trial 1</b>   | <b>Trial 2</b>   | <b>Trial 3</b>   | <b>Average</b>   | <b>SD</b> | <b>%RSD</b> |
|-----------------------------------|------------------|------------------|------------------|------------------|-----------|-------------|
|                                   | <b>Peak area</b> | <b>Peak area</b> | <b>Peak area</b> | <b>Peak area</b> |           |             |
| 3.125                             | 0.07             | 0.07             | 0.08             | 0.07             | 0.003     | 4.313       |
| 6.250                             | 0.14             | 0.13             | 0.14             | 0.14             | 0.004     | 2.587       |
| 12.50                             | 0.50             | 0.50             | 0.50             | 0.50             | 0.003     | 0.517       |
| 25.00                             | 1.00             | 0.99             | 0.98             | 0.99             | 0.010     | 1.049       |
| 31.25                             | 1.29             | 1.17             | 1.24             | 1.24             | 0.047     | 3.830       |
| 43.75                             | 1.67             | 1.81             | 1.76             | 1.75             | 0.057     | 3.240       |
| 50.00                             | 1.98             | 2.09             | 2.00             | 2.02             | 0.050     | 2.495       |
| 62.50                             | 2.35             | 2.48             | 2.51             | 2.45             | 0.070     | 2.852       |
| 80.00                             | 3.22             | 3.25             | 3.21             | 3.23             | 0.015     | 0.456       |
| 105.0                             | 4.22             | 4.11             | 3.97             | 4.10             | 0.099     | 2.419       |
| 125.0                             | 4.77             | 4.79             | 4.67             | 4.74             | 0.050     | 1.063       |

**Table S4** Comparison of 5 minute and 1 minute scan times. Comparison of scan times for Des at 6.25 ng/ $\mu$ L shows that reducing the analysis time to 1 minute does not substantially compromise accuracy or reproducibility

|              | <b>Urine</b>     |             | <b>Serum</b>     |              |
|--------------|------------------|-------------|------------------|--------------|
|              | <b>Peak Area</b> | <b>%RSD</b> | <b>Peak Area</b> | <b>% RSD</b> |
| <b>5 min</b> | 0.69             | 1.49        | 0.77             | 1.89         |
| <b>1 min</b> | 0.72             | 4.46        | 0.77             | 2.54         |

**Fig. S2**  $^1\text{H}$  NMR spectra of UV-irradiated Des at different time intervals (0, 5, 15, 30 and 60 min)

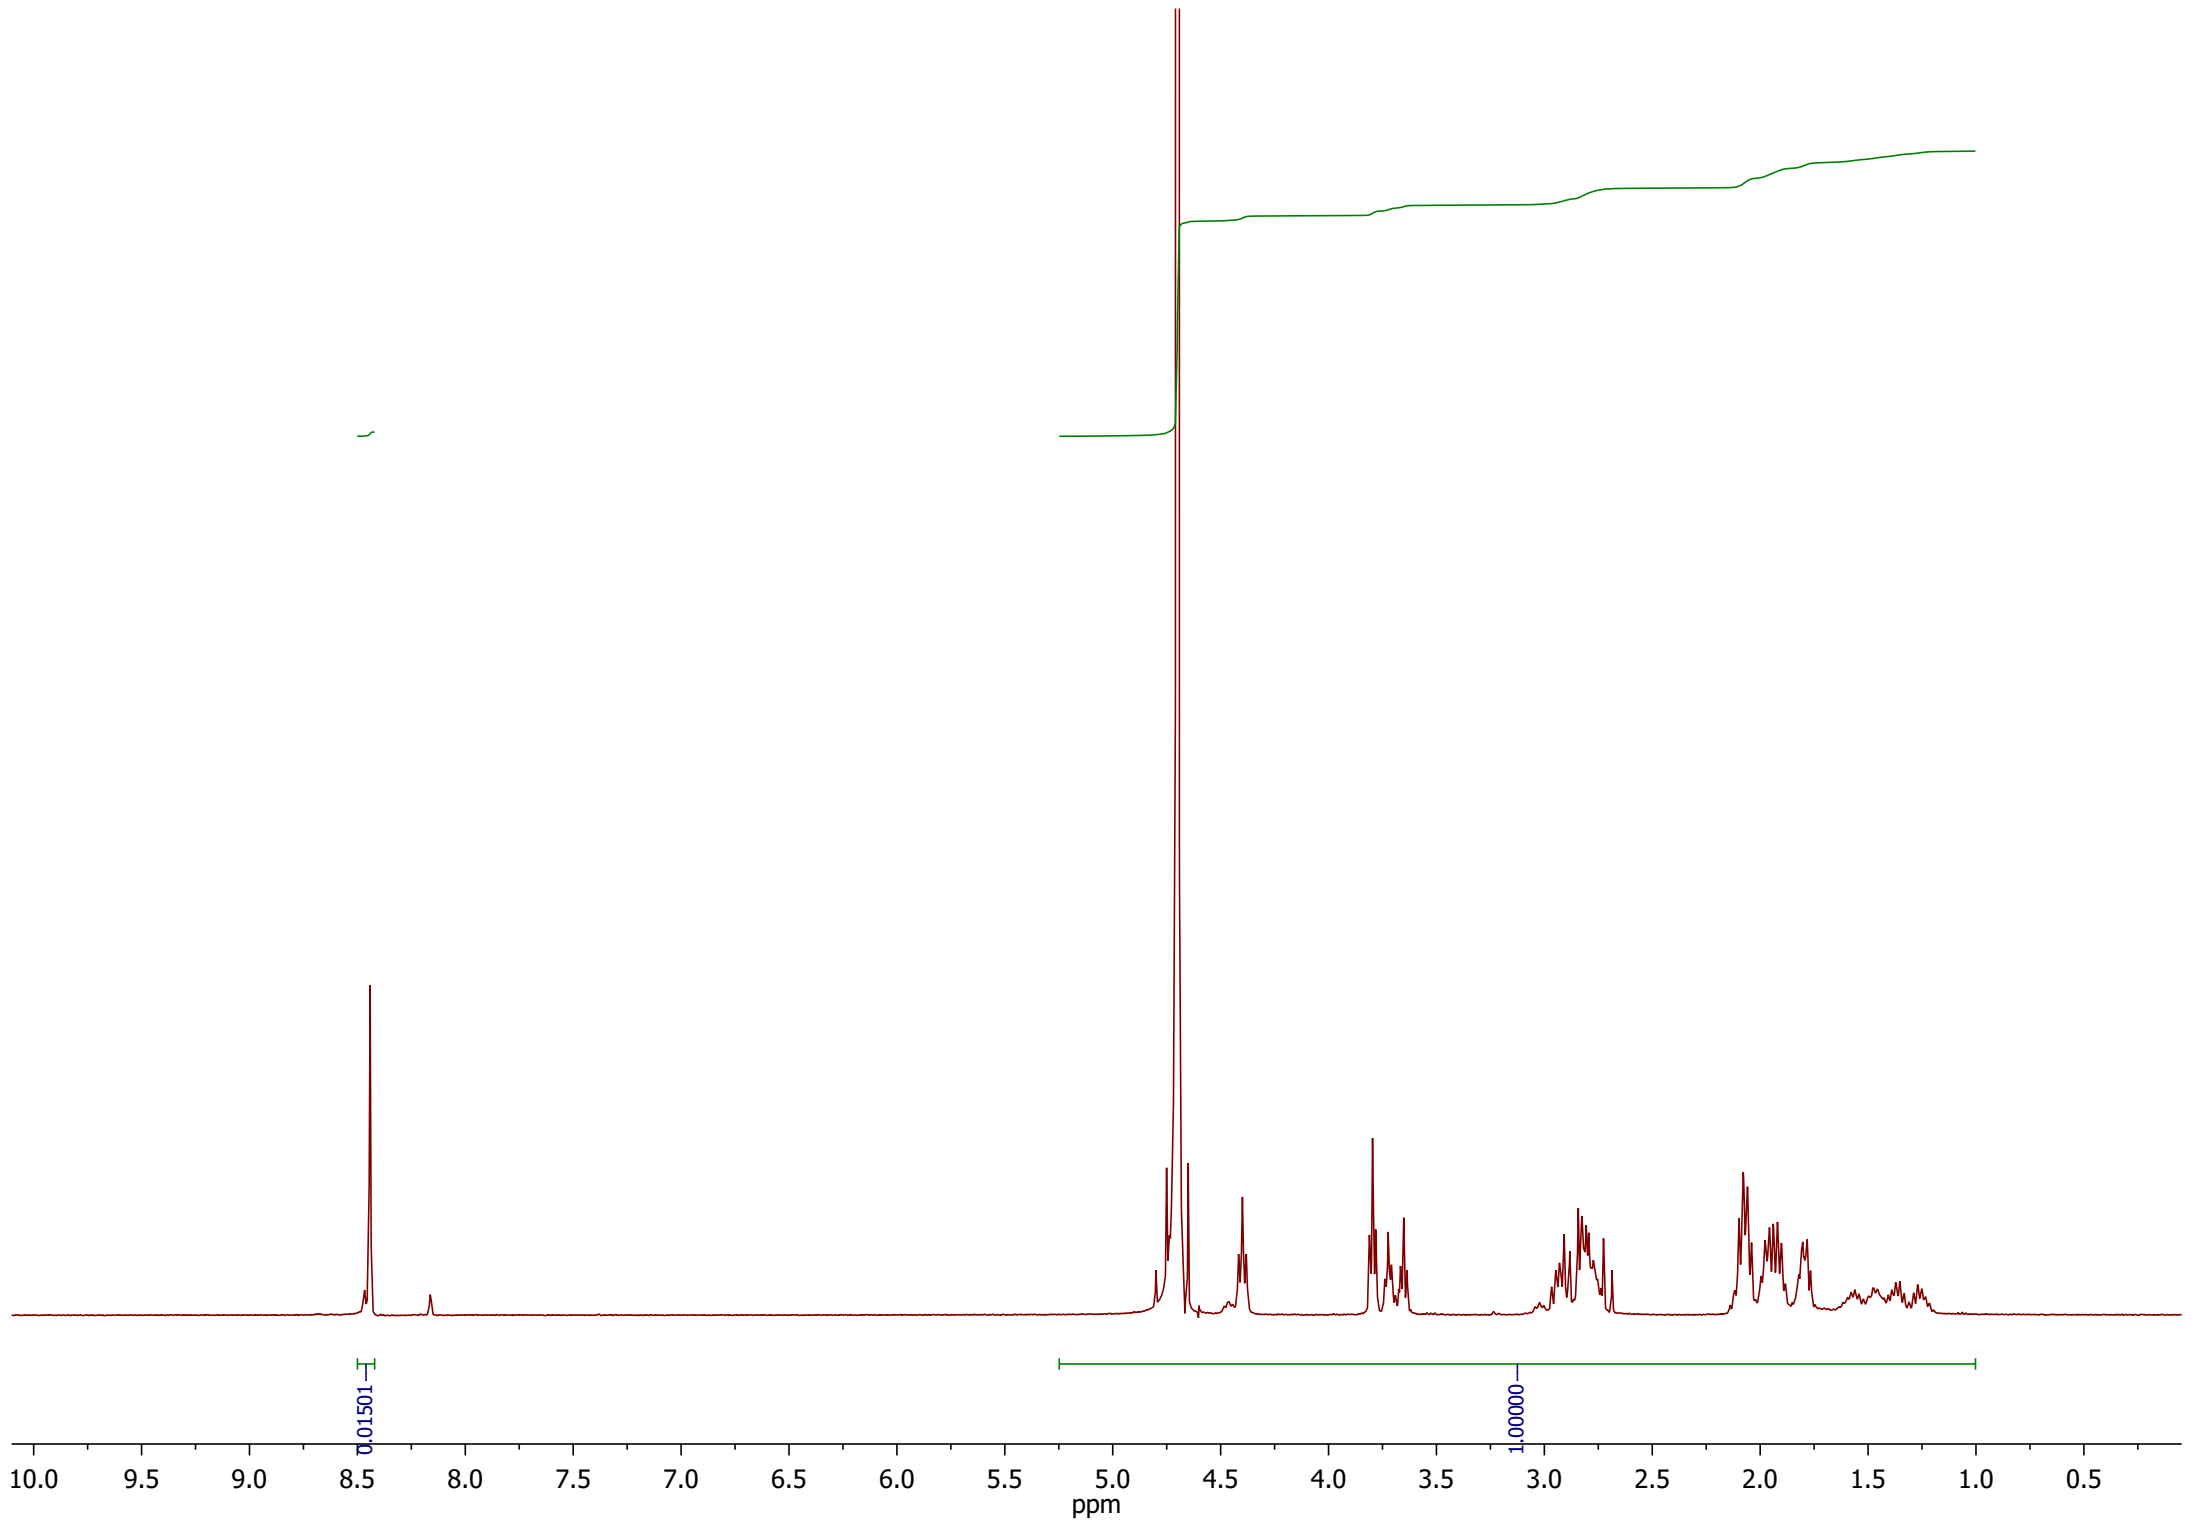

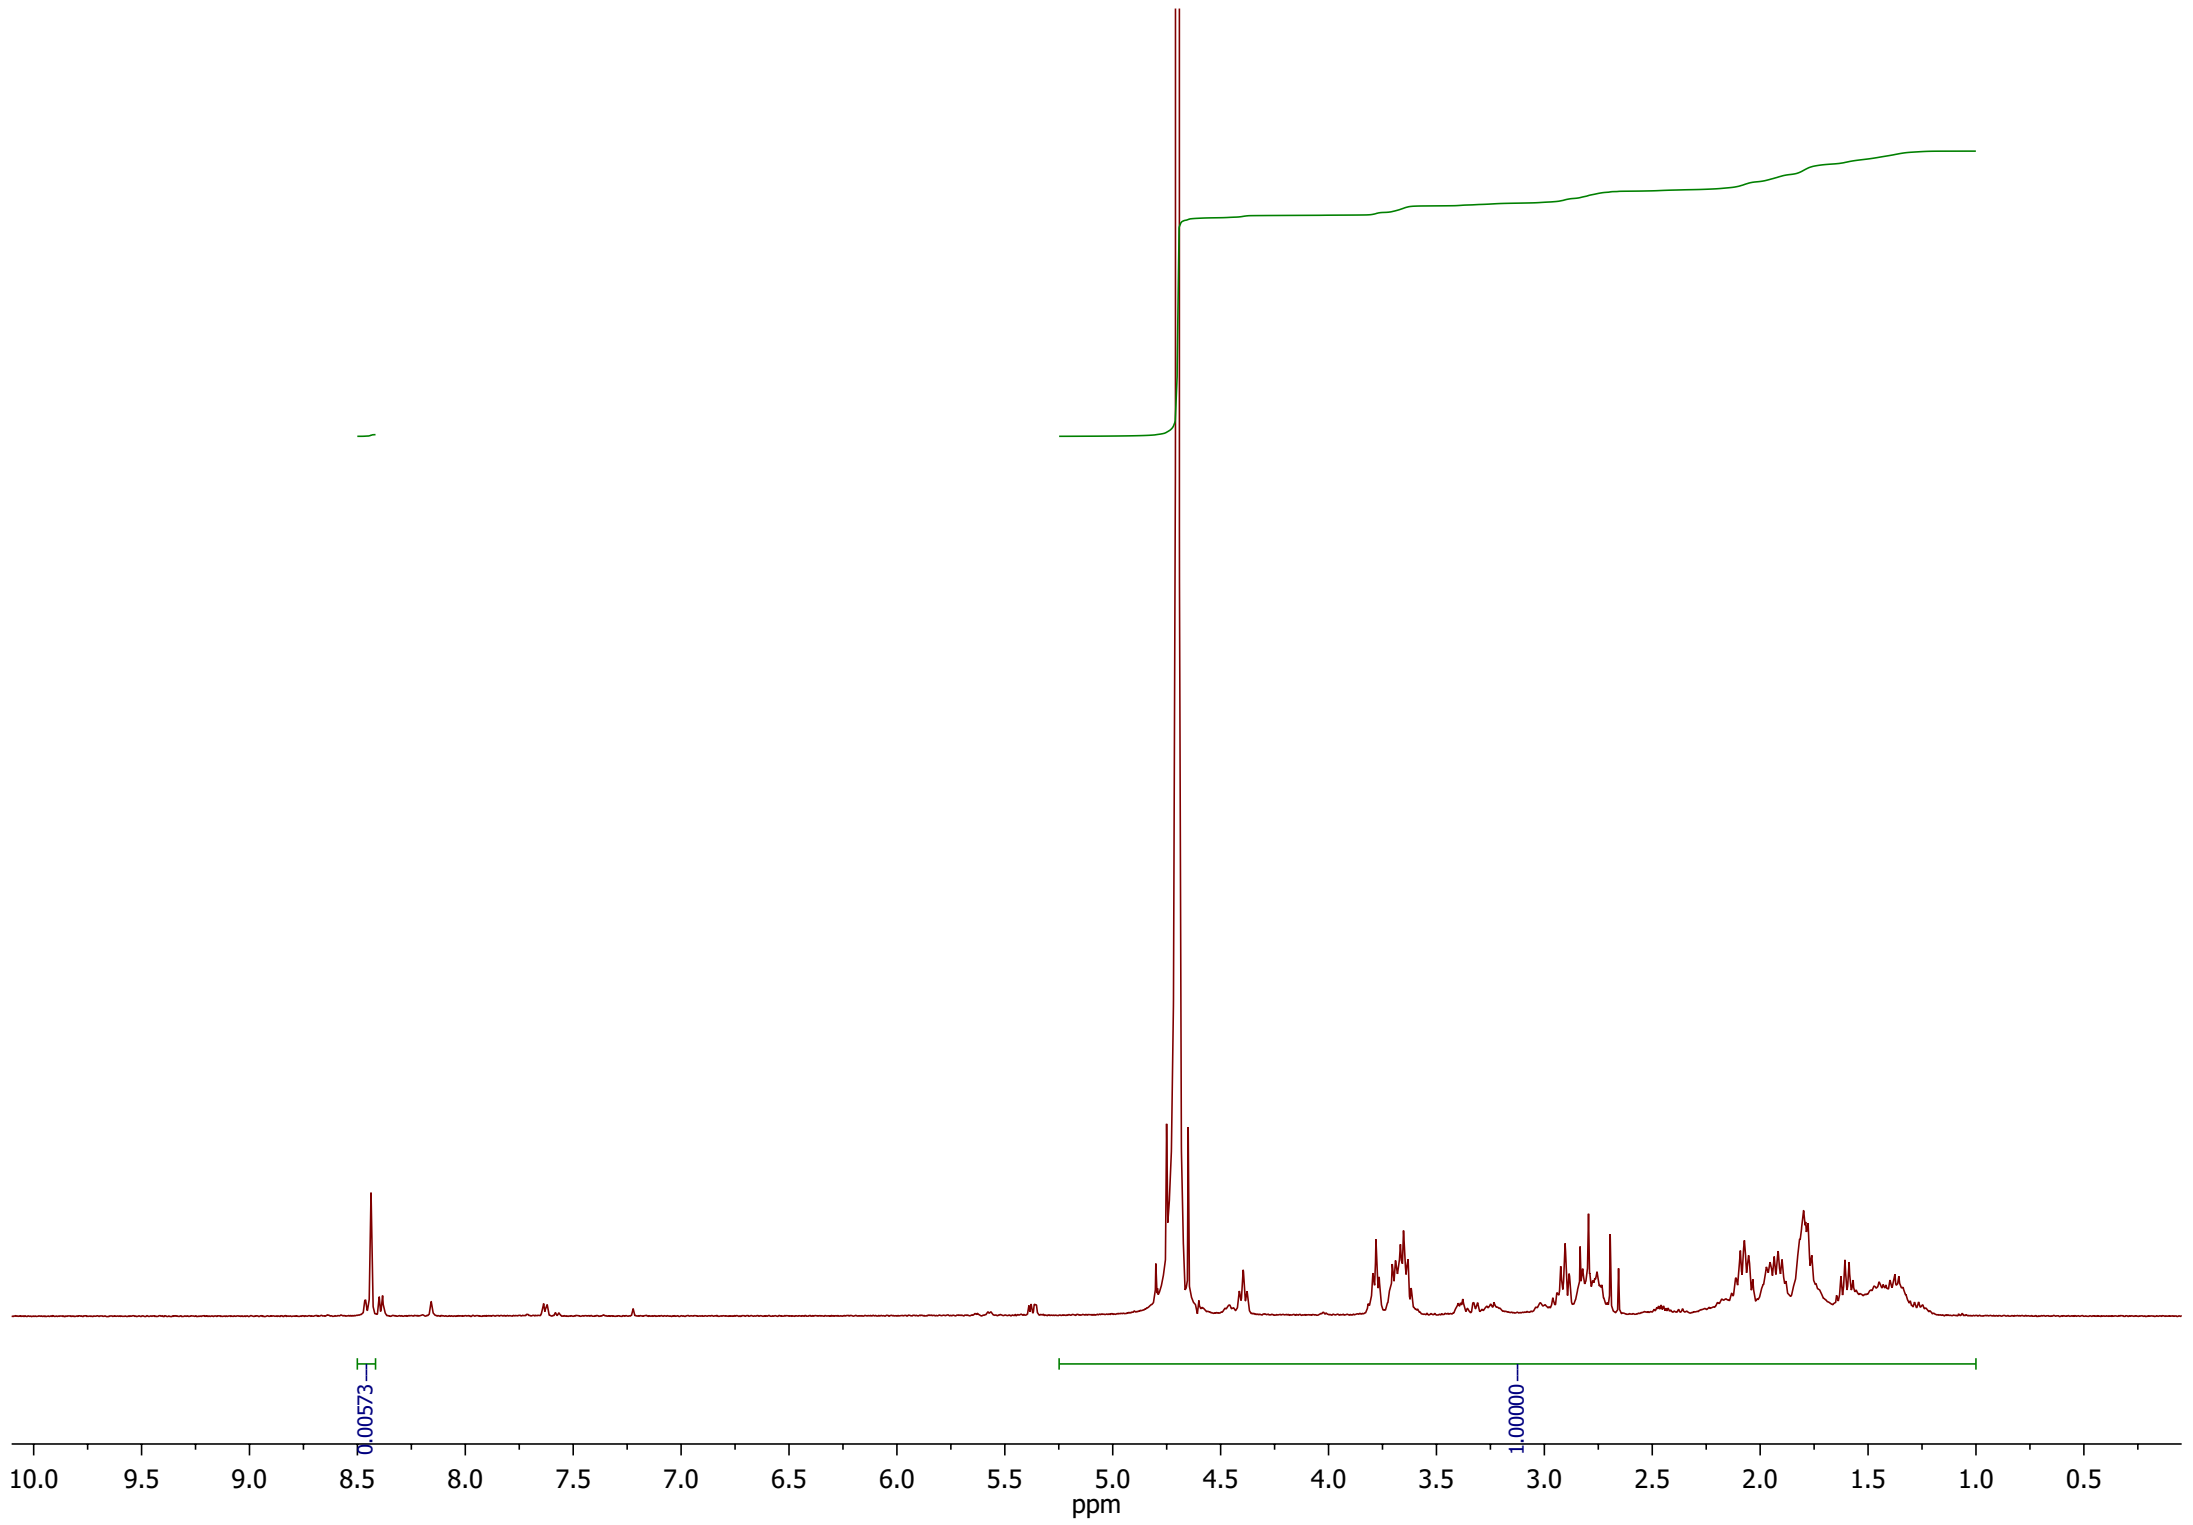

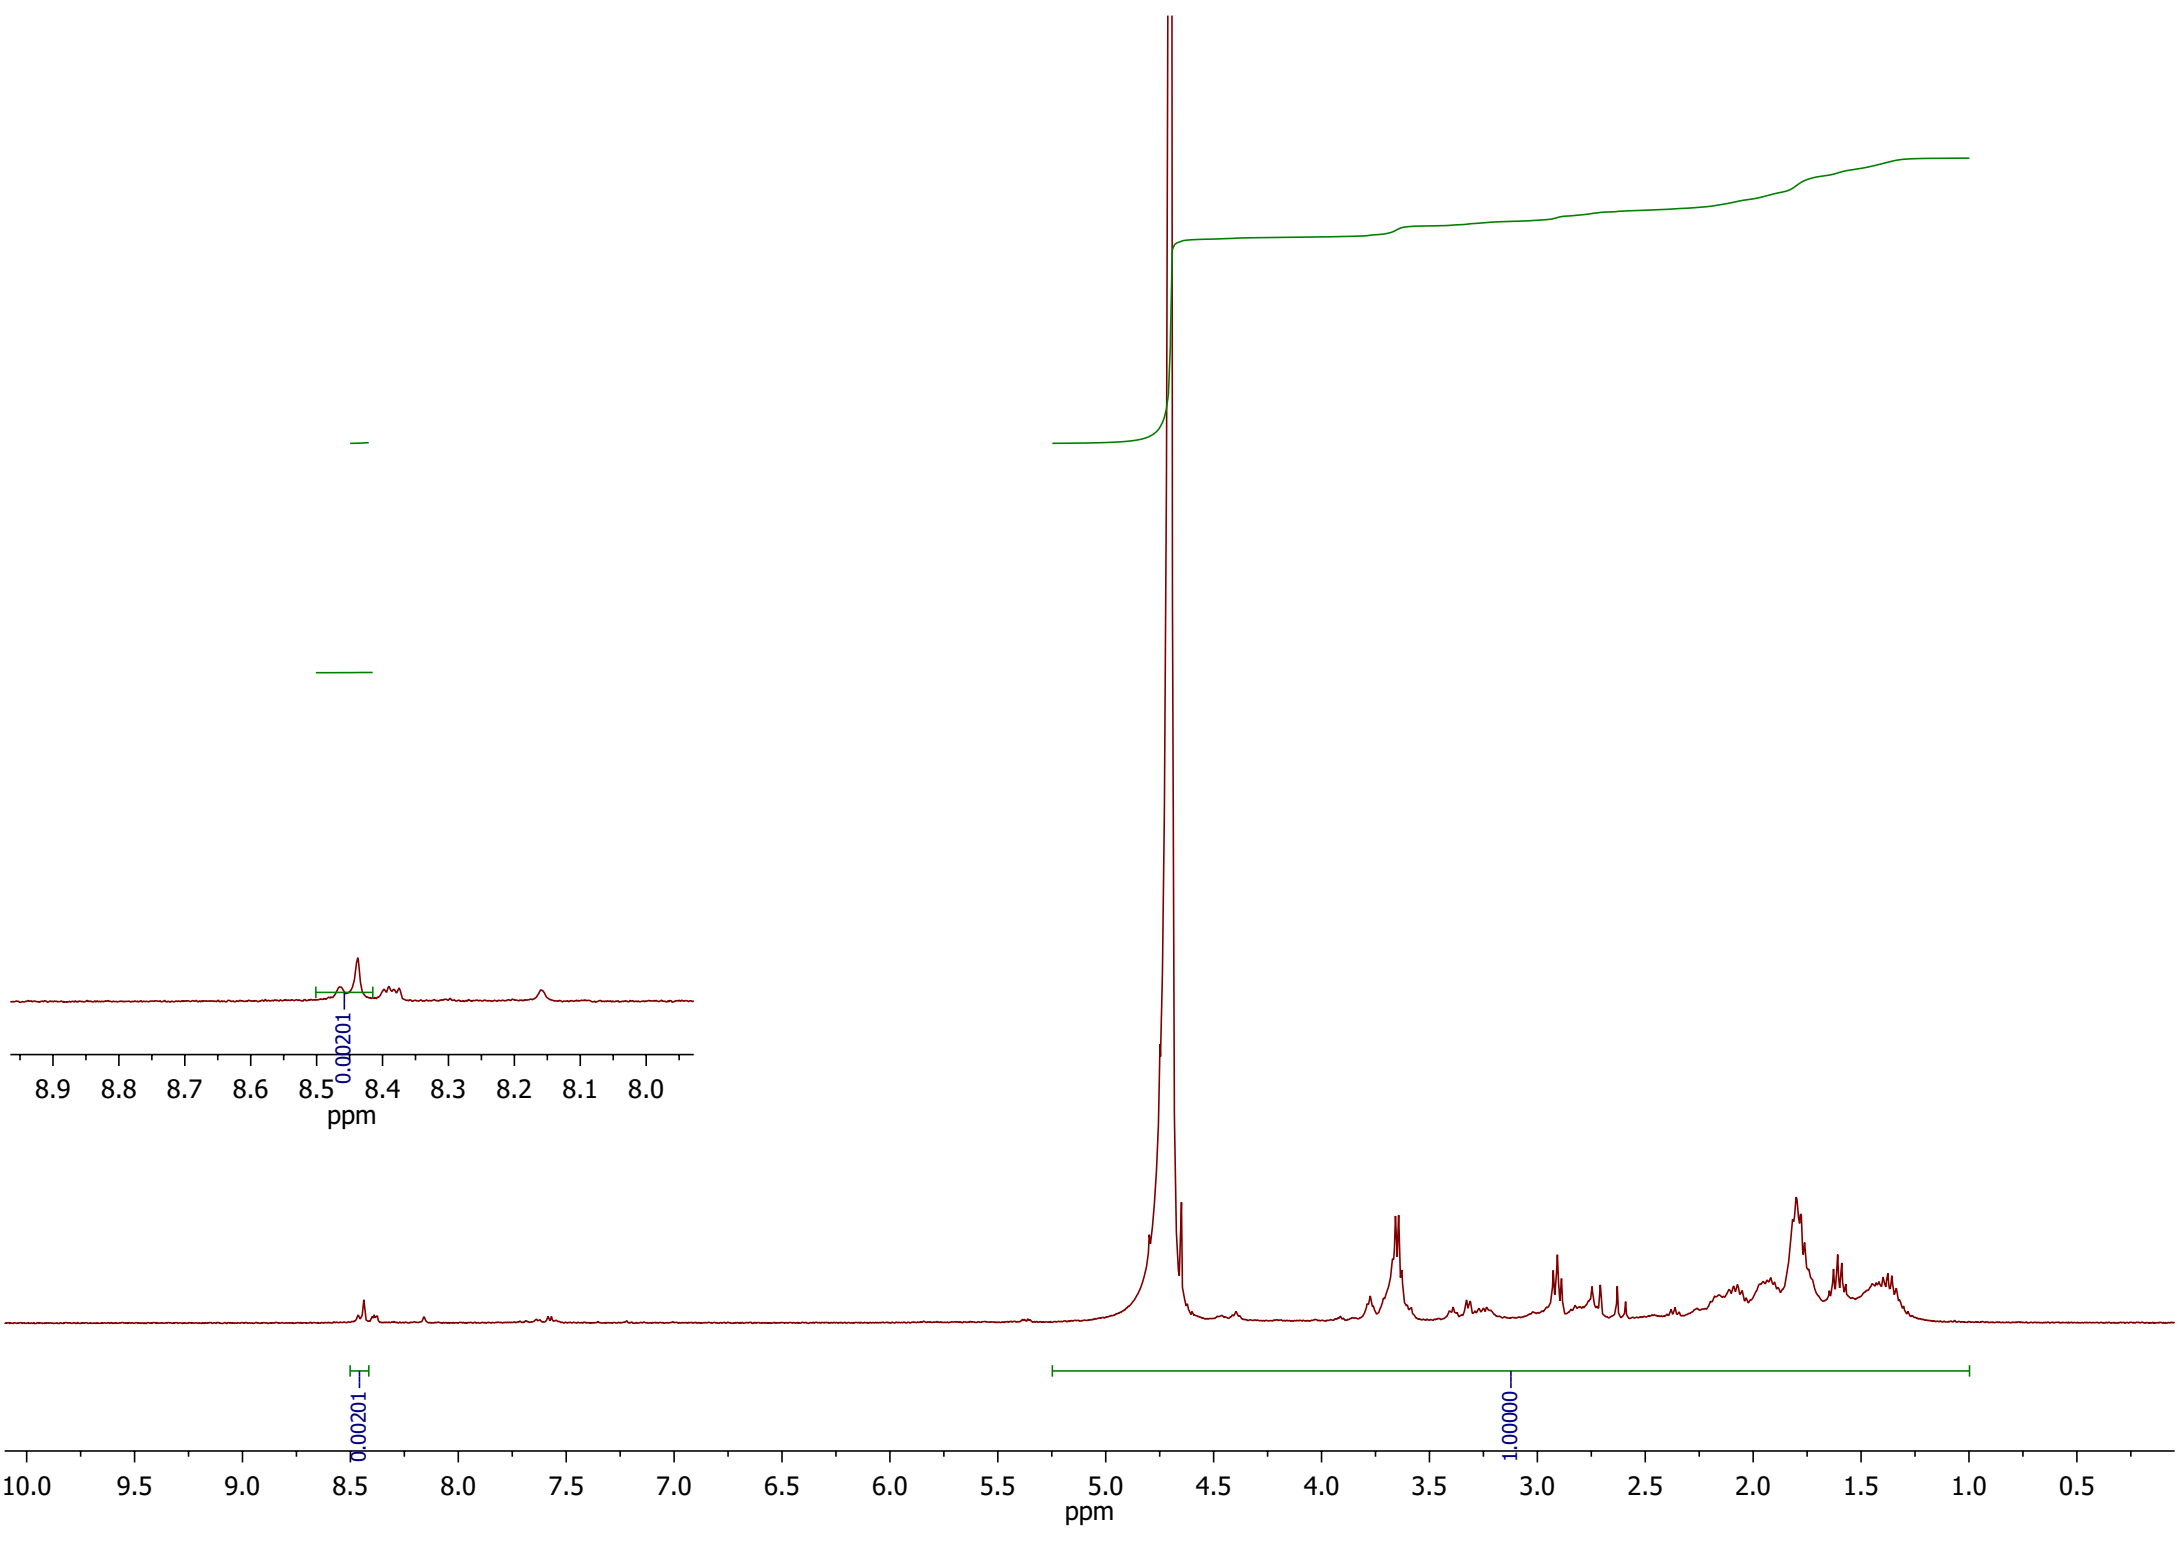

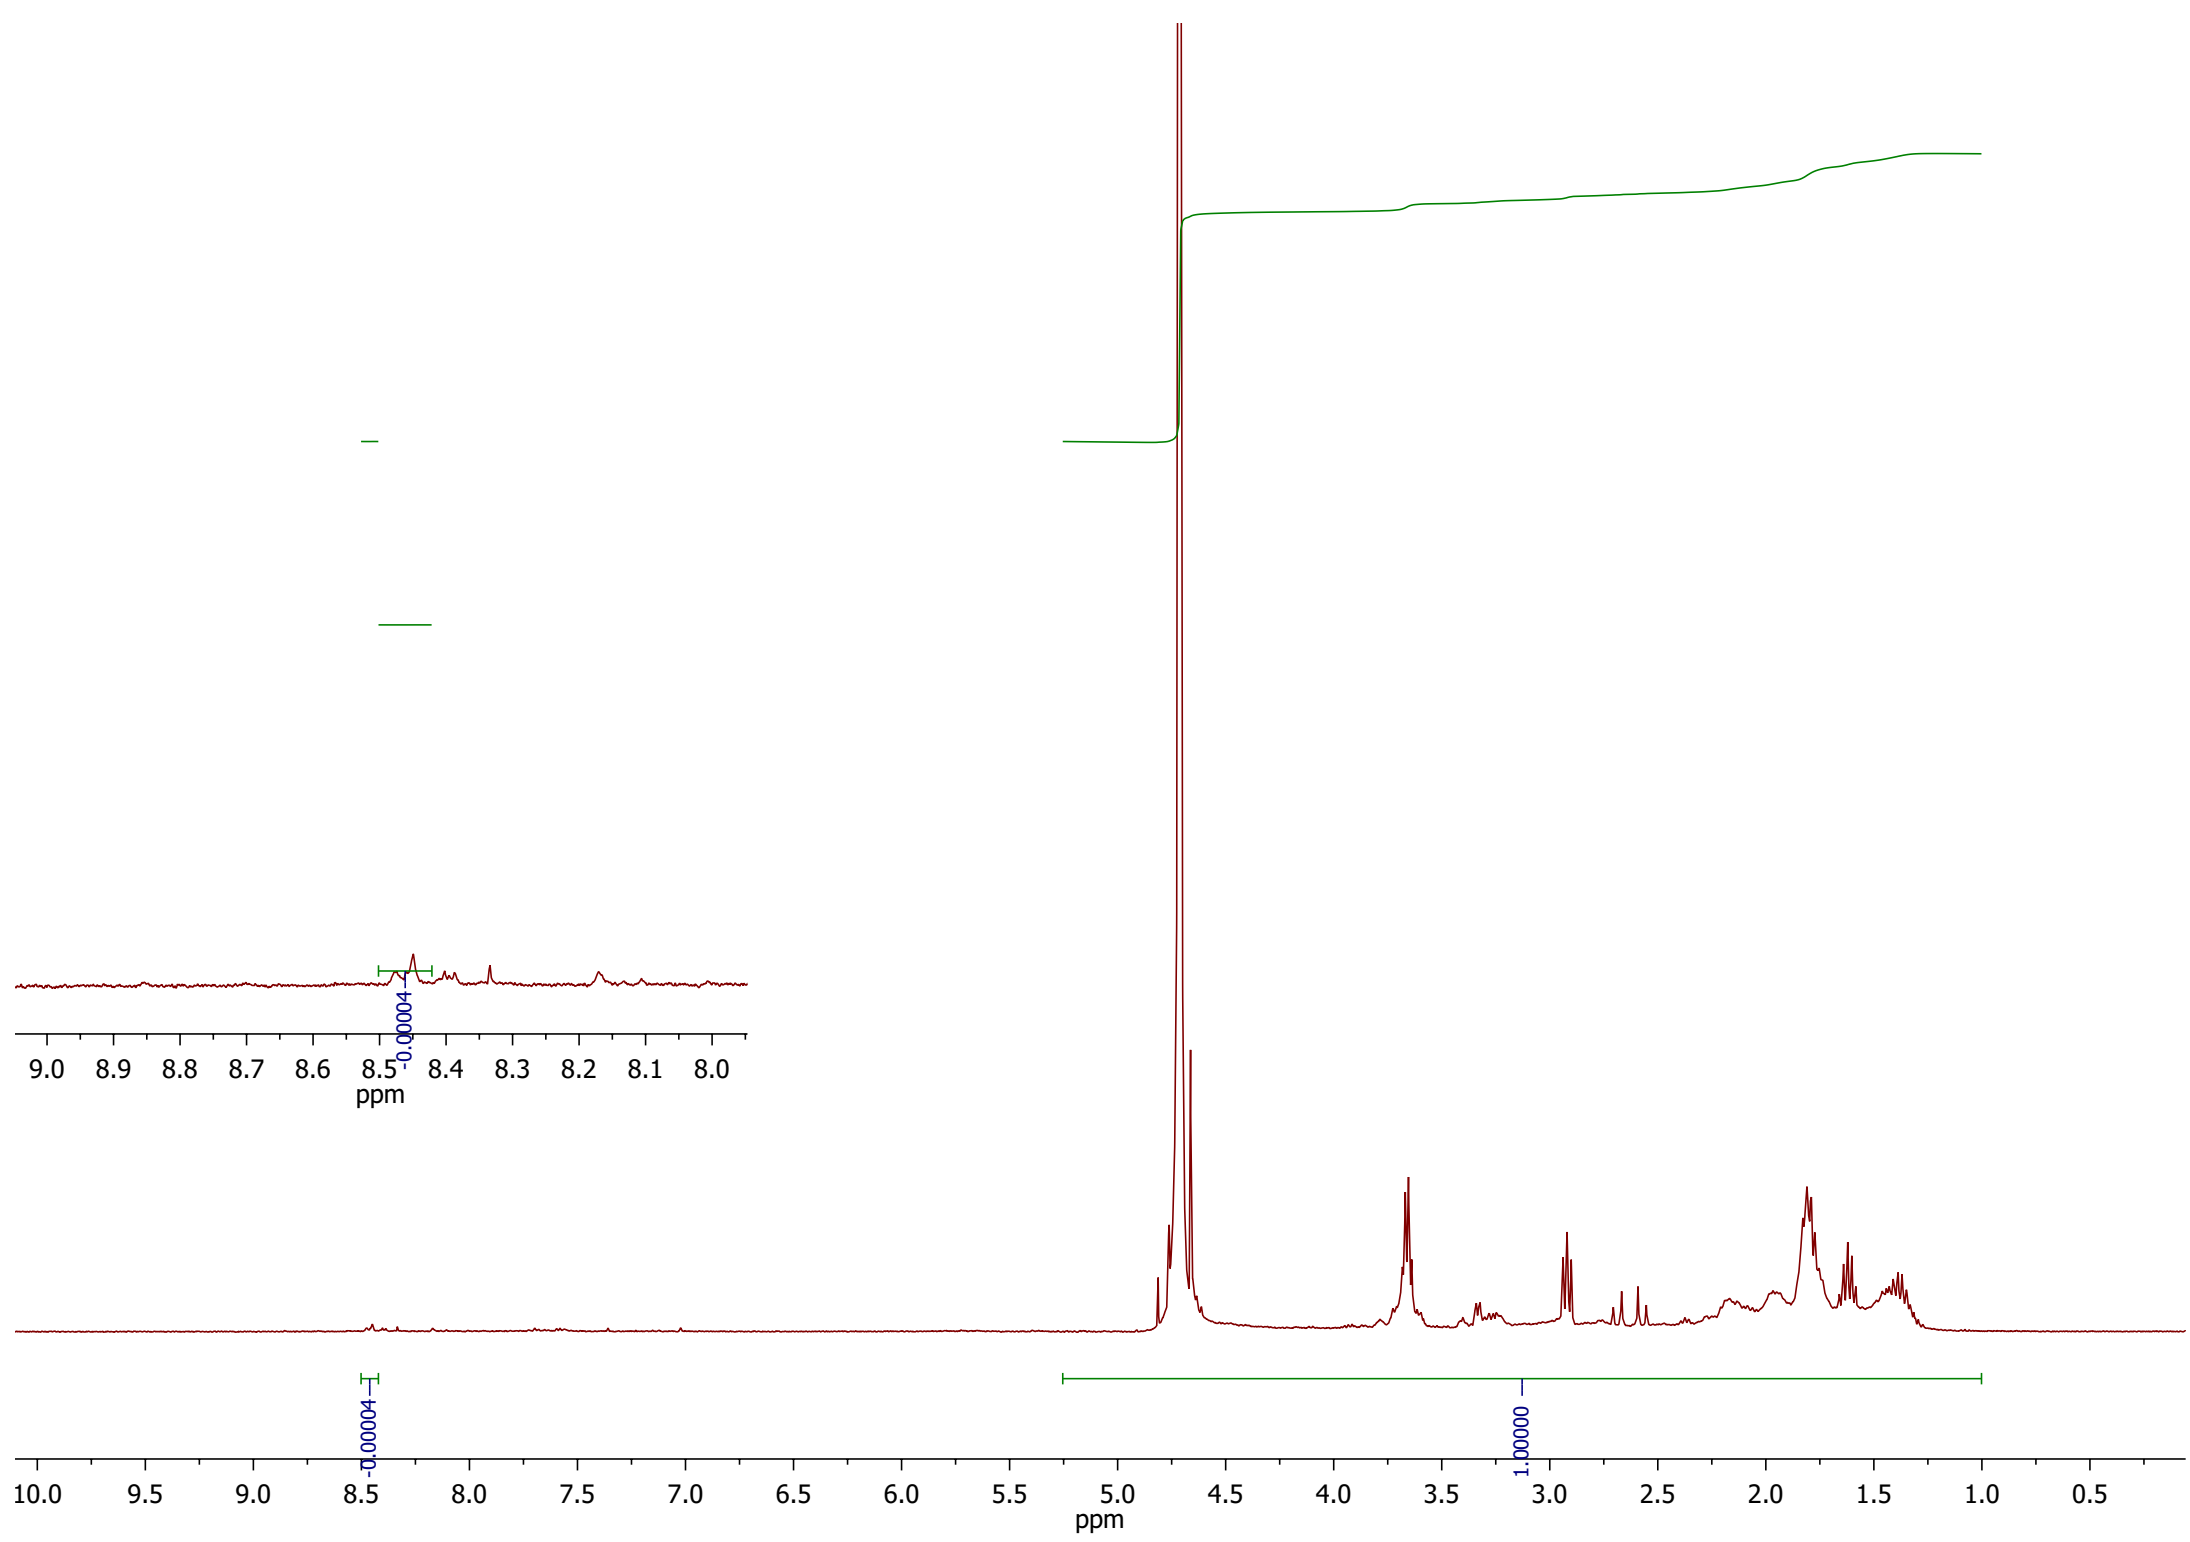



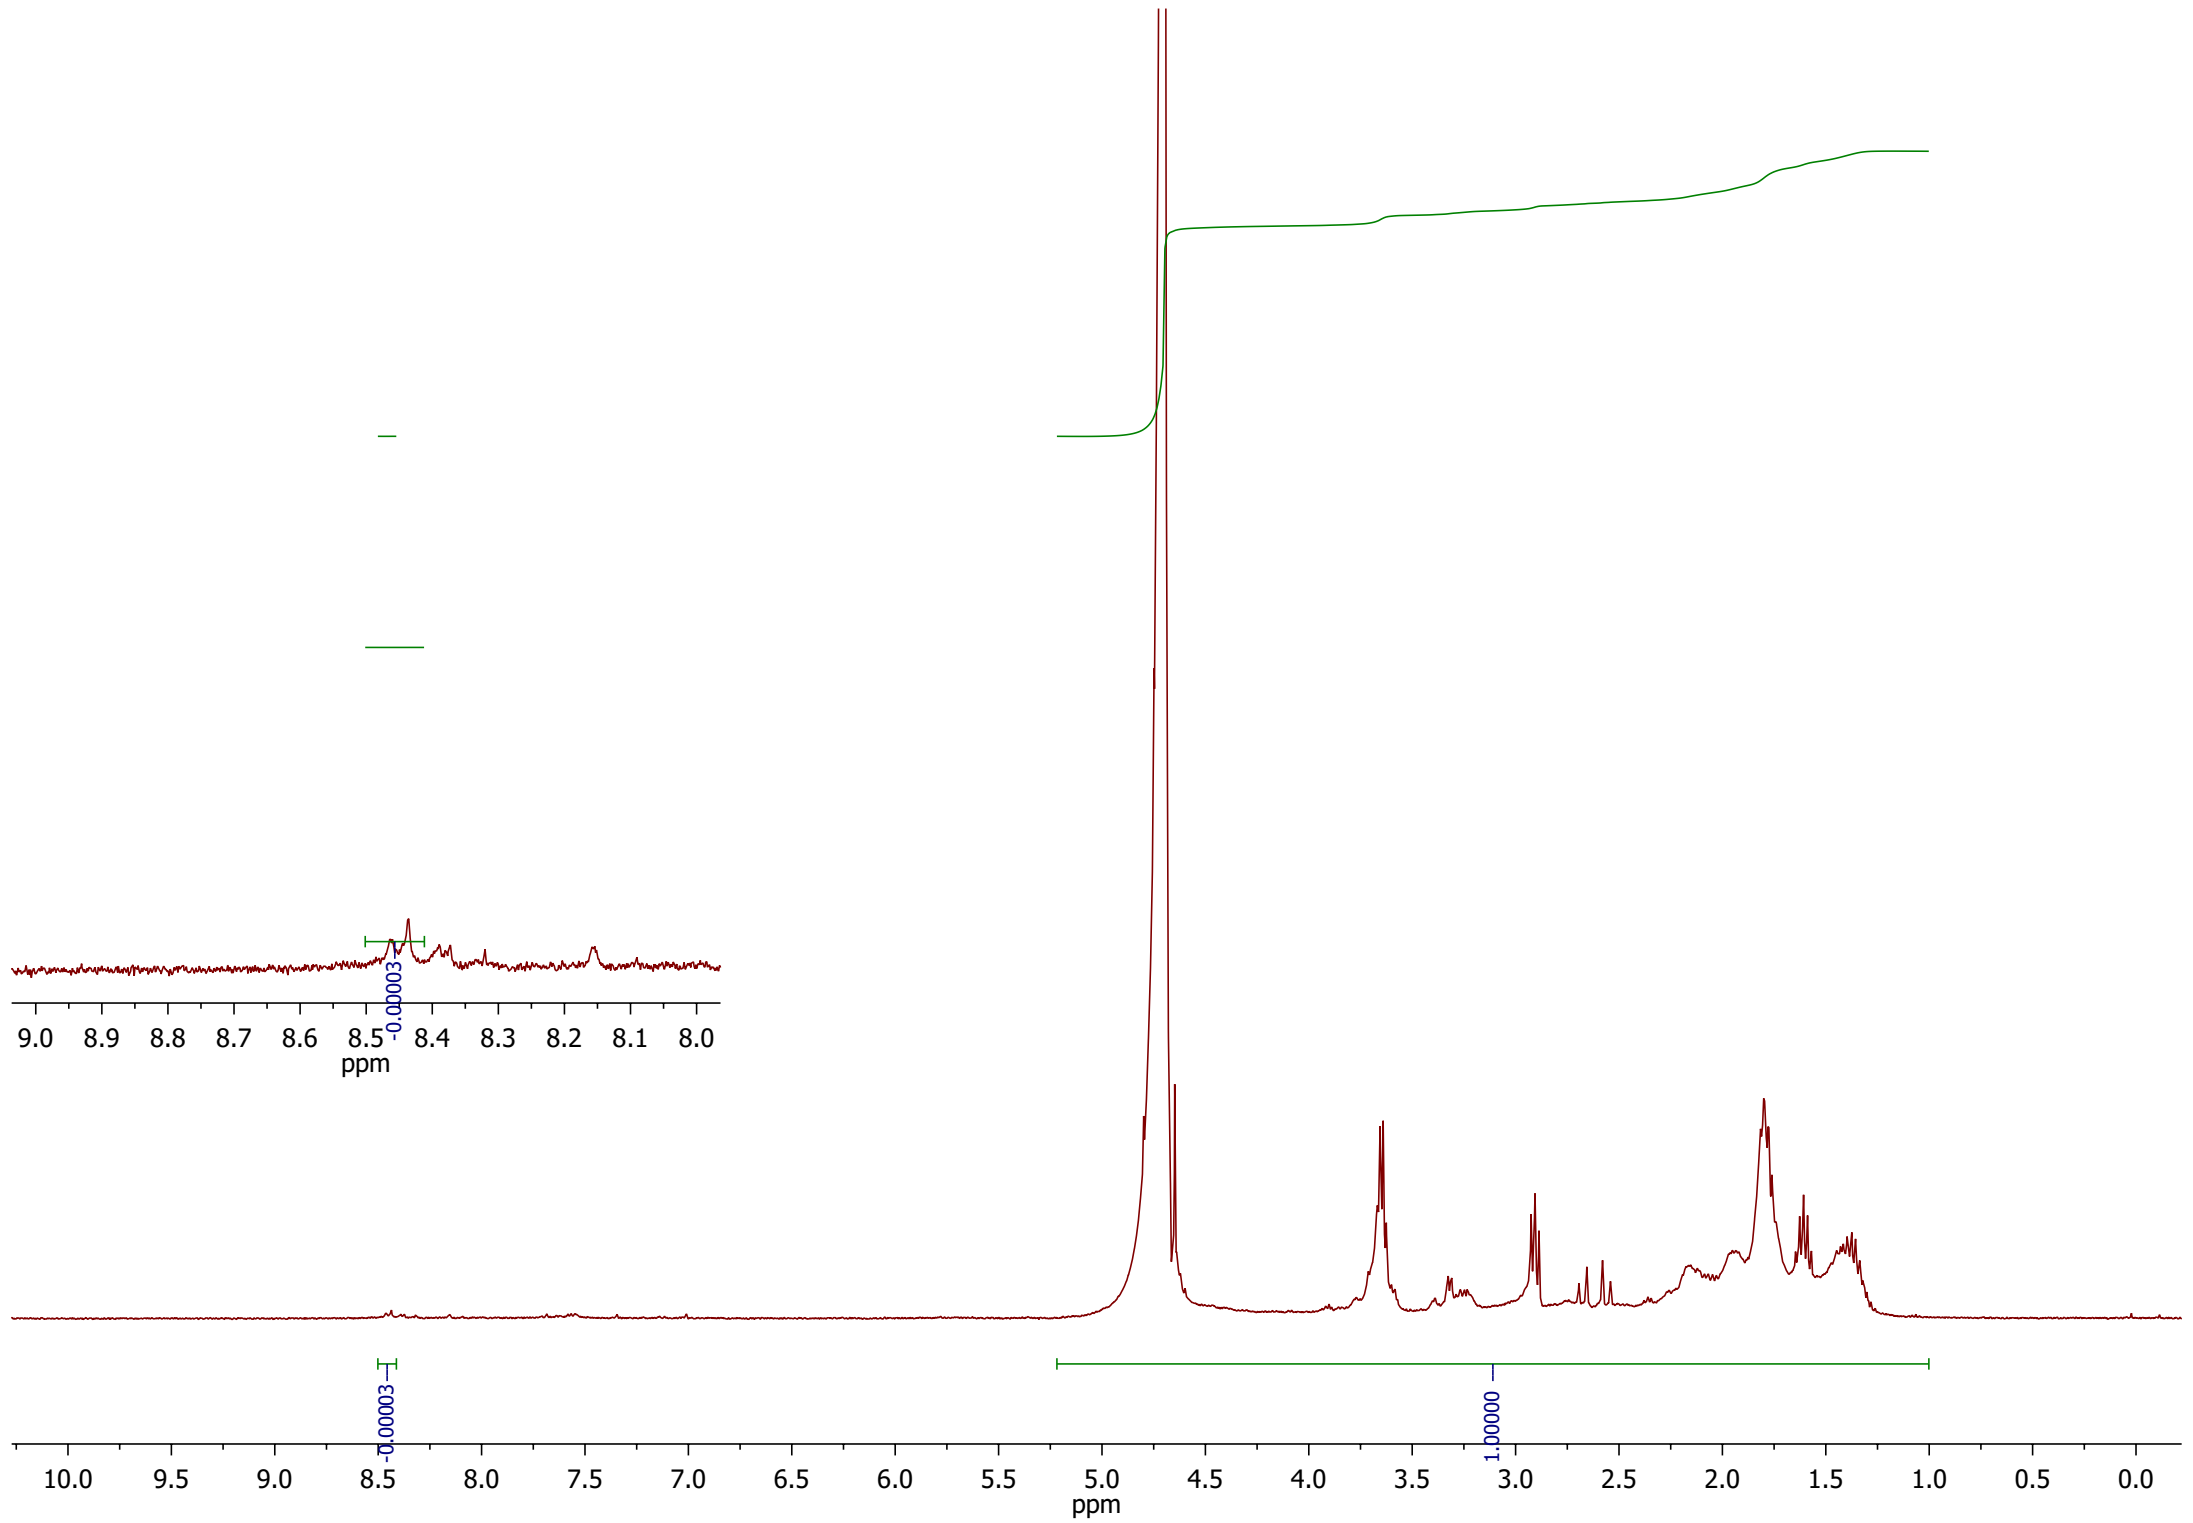

Supplement: NIHMS1502241-supplement-216_2018_1288_MOESM1_ESM.pdf [file NIHMS1502241-supplement-216_2018_1288_MOESM1_ESM.pdf]
